# Supplementary material for: Comparison of the TOFscan and the TOF-Watch SX during pediatric neuromuscular function recovery: a prospective observational study
Source: Springer Nature journal article supplement (doi:10.1186/s13741-021-00215-2), 2021-12-01

Supplement 1. Non-normalized Bland-Altman plot

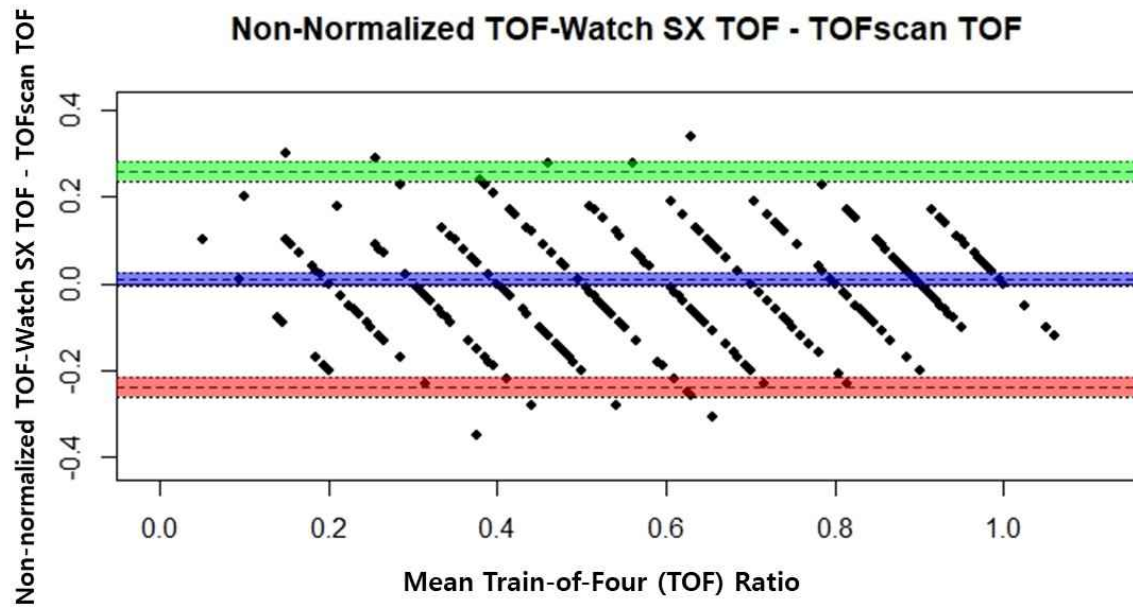

Supplement: MOESM1 [file 19949330]
