# Supplementary material for: Comparison of the TOFscan and the TOF-Watch SX during pediatric neuromuscular function recovery: a prospective observational study
Source: Springer Nature journal article supplement (doi:10.1186/s13741-021-00215-2), 2021-12-01

Supplement 2. Probability plot for the differences.

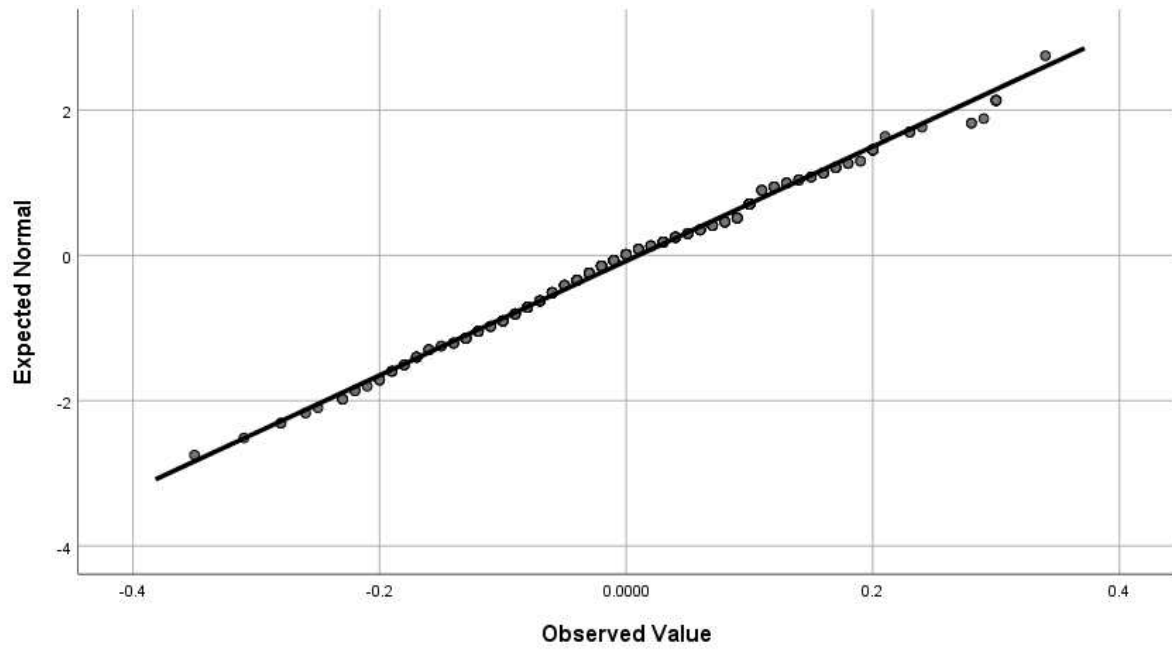

Supplement: MOESM2 [file 19949330]
